*Obsessive-Compulsive Disorder*

**FOCUS** THE JOURNAL OF LIFELONG LEARNING IN PSYCHIATRY

Summer 2007, Volume V, Number 3

# FOCUS



THE JOURNAL OF LIFELONG LEARNING IN PSYCHIATRY

## *Obsessive-Compulsive Disorder*

*Guest Editors, John H. Greist, M.D.  
James W. Jefferson, M.D.*

### IN CLINICAL SYNTHESIS:

Obsessive-Compulsive Disorder

*John H. Griest, M.D.  
James W. Jefferson, M.D.*

### IN REVIEW:

Obsessive-Compulsive Disorder:  
An Update for the Clinician

*Lorrin M. Koran, M.D.*

AND INFLUENTIAL PUBLICATIONS . . .
