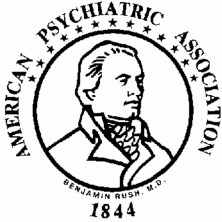

PRACTICE GUIDELINE FOR THE TREATMENT OF PATIENTS WITH  
**OBSESSIVE-COMPULSIVE DISORDER**

A New Practice Guideline course is coming Summer 2007 to the APA website.  
[www.psych.org/cme](http://www.psych.org/cme).

*Practice Guideline for the Treatment of Patients with  
Obsessive-Compulsive Disorder*

**COURSE DESCRIPTION**

The course includes the complete guideline, board-type vignette style multiple-choice questions based on the guideline, and discussion of answers with links back into the guideline text. The course is presented in an easy to use format. Progress is tracked as you move through the course. The new Obsessive-Compulsive Disorder course provides up to 5 AMA PRA Category 1 Credits and allows APA members to print a certificate on completion of the course.

**COURSE OBJECTIVE**

To improve patient care for patients with Obsessive-Compulsive Disorder by incorporating the principles of the guideline into individual practice.

**Practice Guideline Courses are Free to APA members** Non APA members may complete APA practice guideline courses for a fee of \$60.00 per course.

● **APA Practice guideline courses may be a helpful aide in preparation for ABPN certification and recertification examinations as well as part of a practical lifelong learning program. 12 practice guideline courses are available on the APA website**  
[www.psych.org/cme](http://www.psych.org/cme)

● The APA is accredited by the ACCME to provide continuing medical education for physicians. The APA designates this educational activity for a maximum of 5 *AMA PRA Category 1 Credit(s)*<sup>™</sup>. Physicians should only claim credit commensurate with the extent of their participation in the activity.

*For further information, please contact:*  
**American Psychiatric Association, Division of Education, [cgarner@psych.org](mailto:cgarner@psych.org).**  
Visit our website at [www.psych.org/cme](http://www.psych.org/cme)

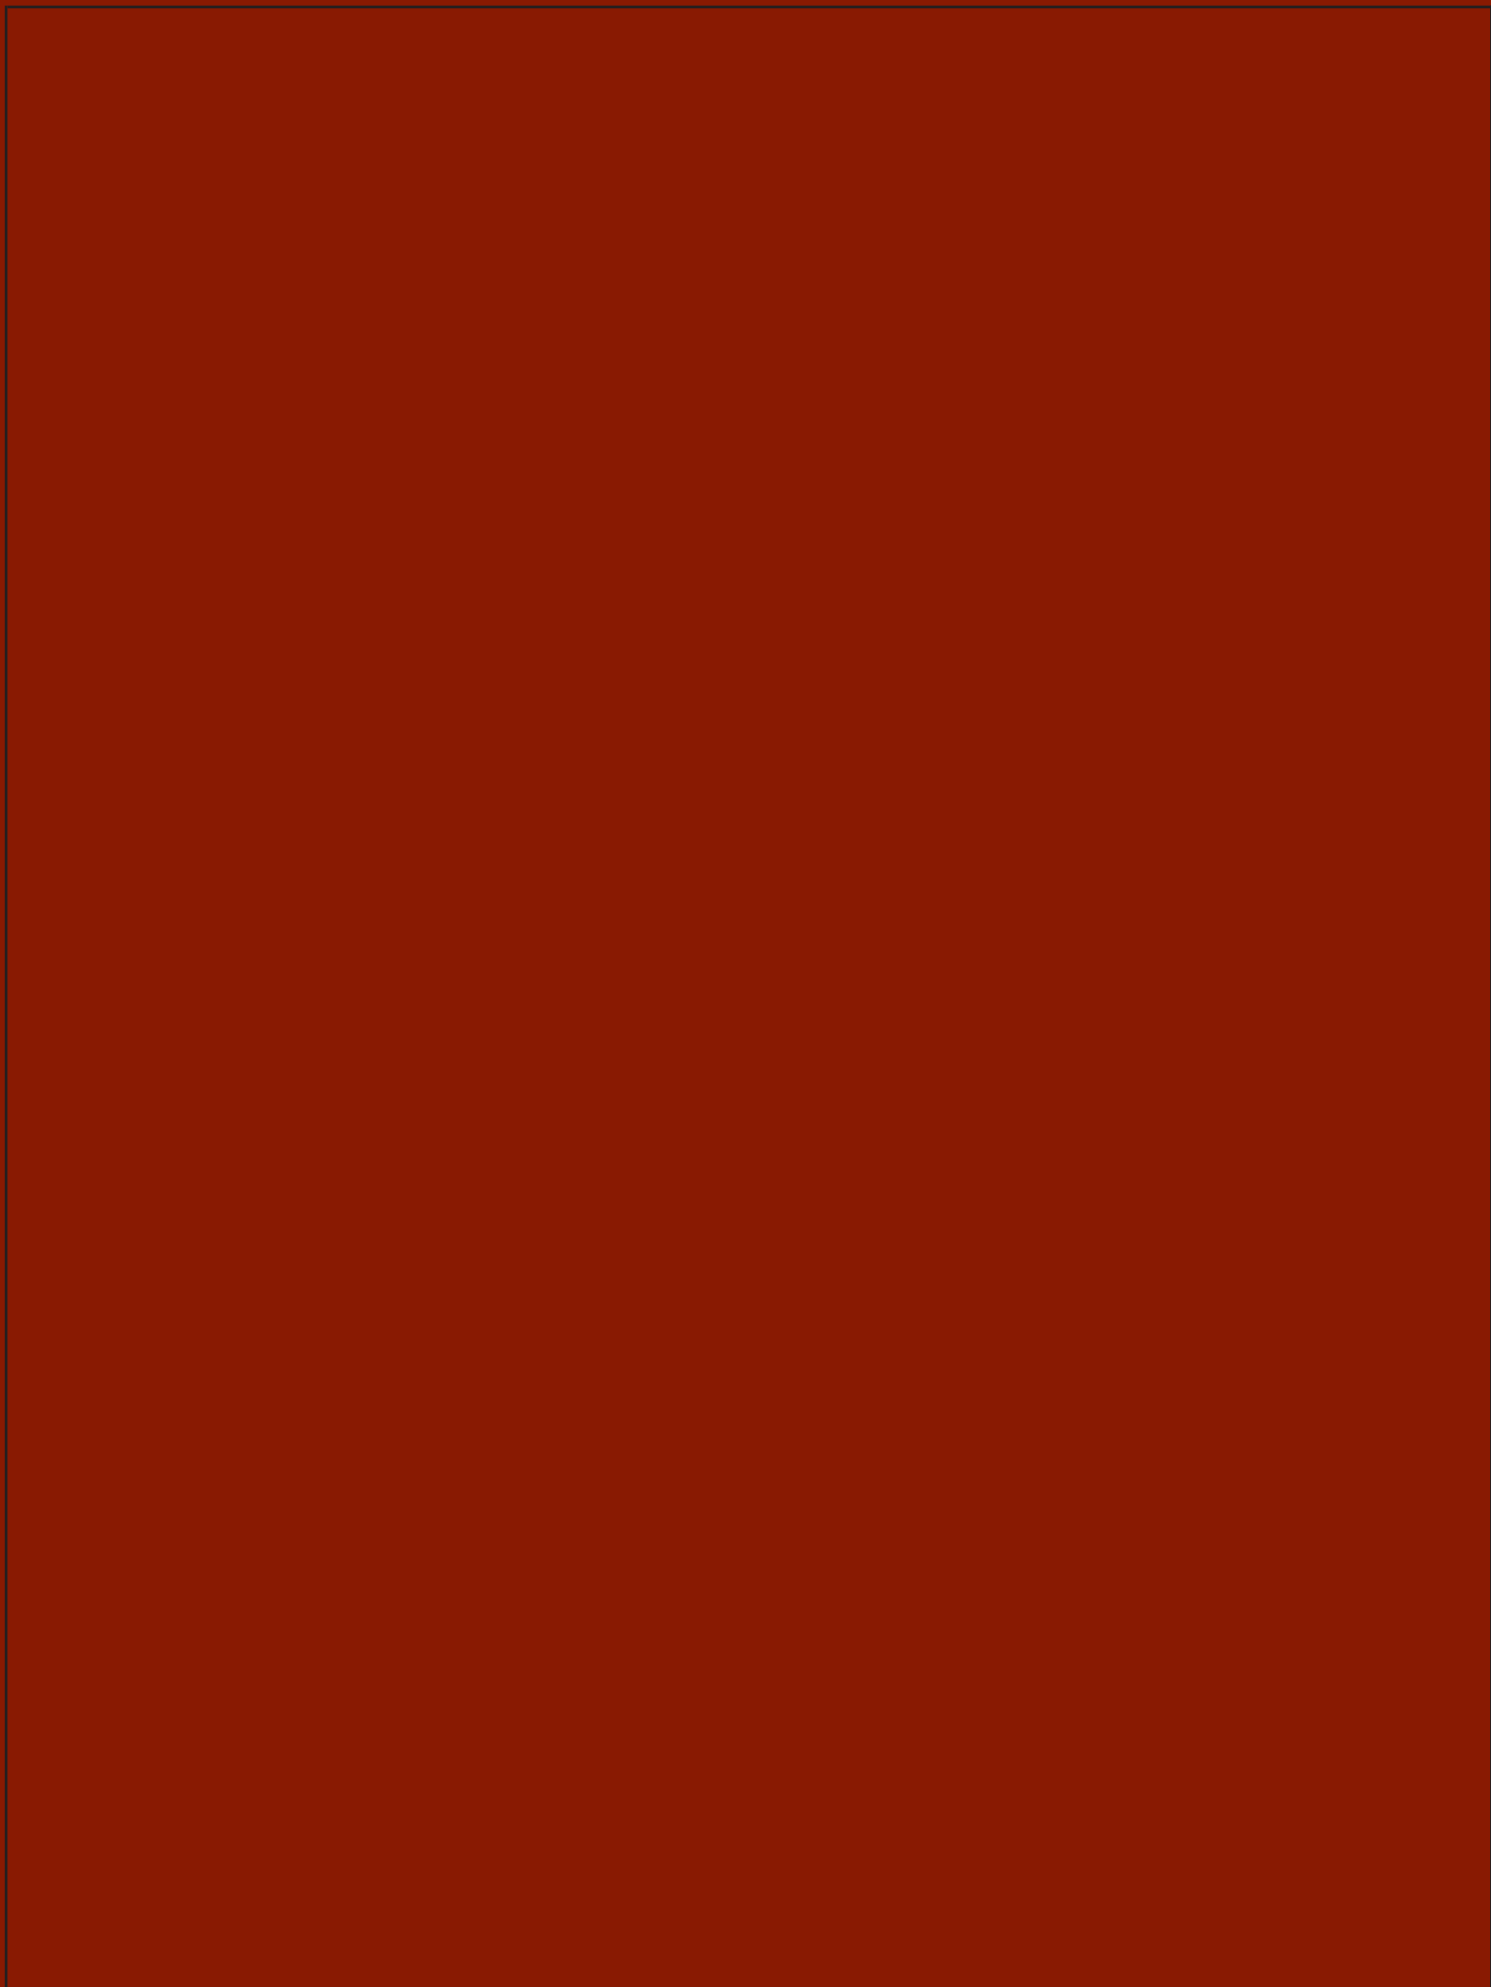

Source: https://psychiatryonline.org/doi/suppl/10.1176/foc.2007.5.issue-3/suppl_file/back.pdf
