---

---

EDITORS

---

**Deborah J. Hales, M.D.**  
Arlington, Virginia

**Mark Hyman Rapaport, M.D.**  
Los Angeles, California

PATIENT MANAGEMENT EXERCISE

**Ronald C. Albucher, M.D., Editor**  
San Francisco, California

**B. Harrison Levine, M.D., M.P.H., Associate Editor**  
New York, New York

---

---

SENIOR ADVISORY BOARD

---

**Carol A. Bernstein, M.D.**  
New York, New York

**Paula J. Clayton, M.D.**  
Santa Fe, New Mexico

**Pedro L. Delgado, M.D.**  
San Antonio, Texas

**Howard H. Goldman, M.D.**  
Potomac, Maryland

**Ira M. Lesser, M.D.**  
Torrance, California

**Charles F. Reynolds III, M.D.**  
Pittsburgh, Pennsylvania

**Altha J. Stewart, M.D.**  
Philadelphia, Pennsylvania

**Stephen C. Scheiber, M.D.**  
Glenview, Illinois

**Daniel K. Winstead, M.D.**  
New Orleans, Louisiana

**Joel Yager, M.D.**  
Los Angeles, California

---

---

EDITORIAL BOARD

---

**Joseph A. Cheong, M.D.**  
Gainesville, Florida

**Laura Dunn, M.D.**  
San Diego, California

**John B. Herman, M.D.**  
Boston, Massachusetts

**Donald M. Hilty, M.D.**  
Sacramento, California

**Geetha Jayaram, M.D., M.B.A.**  
Baltimore, Maryland

**Thomas A.M. Kramer, M.D.**  
Northbrook, Illinois

**Daryl Matthews, M.D.**  
Honolulu, Hawaii

**Cheryl F. McCartney, M.D.**  
Chapel Hill, North Carolina

**Philip R. Muskin, M.D.**  
New York, New York

**Michele T. Pato, M.D.**  
Los Angeles, California

**Cynthia W. Santos, M.D.**  
Houston, Texas

**Deborah Spitz, M.D.**  
Chicago, Illinois

**James W. Thompson, M.D., M.P.H.**  
Glen Cove, New York

**Joyce A. Tinsley, M.D.**  
Farmington, Connecticut

**Owen M. Wolkowitz, M.D.**  
San Francisco, California

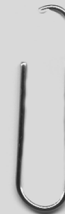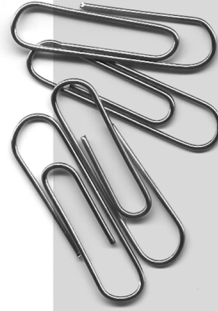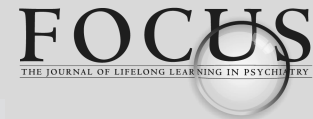

FOCUS, A Journal of the American Psychiatric Association published by American Psychiatric Publishing, Inc.  
ISSN 1541-4094. Printed in the United States.

Published quarterly. Periodicals postage paid at Arlington, VA, and additional mailing offices. POSTMASTER: Send address changes to FOCUS, Circulation Department, American Psychiatric Publishing, Inc., 1000 Wilson Blvd., Suite 1825, Arlington, VA 22209-3901.

**Subscriptions**

U.S. APA member \$264.00, U.S. non-member \$423.00, student \$94.00, resident \$145.00; Canada and foreign APA member \$332.00, Canada and international non-member \$492.00; (703) 907-7300 or (800) 368-5777.

**Officers of the Association**

Pedro Ruiz, M.D., *President*  
Carolyn B. Robinowitz, M.D., *President-Elect*  
Nada L. Stotland, M.D., M.P.H., *Vice-President*  
Donna M. Norris, M.D., *Secretary-Treasurer*  
Michael Blumenfeld, M.D., *Speaker of the Assembly*  
James Scully, M.D., *Medical Director*

**Editorial Offices**

Telephone: (703) 907-8637, Fax: (703) 907-7849  
Journal Web site: [focus.psychiatryonline.org](http://focus.psychiatryonline.org)  
CME Web site: [cme.psychiatryonline.org](http://cme.psychiatryonline.org)

**Change of Address and Assistance With Online Subscriptions**

Call Circulation at (703) 907-7300 or (800) 368-5777.

**CME**

Telephone: (703) 907-8637, Fax: (703) 907-7849

**Subscriber Number**

FOCUS subscriber numbers are printed on the FOCUS label above your name. Call (800) 368-5777 for assistance in identifying your subscriber number.

Copyright © 2007, American Psychiatric Association.

Criteria sets reprinted from Diagnostic and Statistical Manual of Mental Disorders, 4th Edition, Text Revision. Copyright © 2000, American Psychiatric Association. Used with permission.

American Psychiatric Publishing, Inc.  
Journals Division

MANAGING EDITOR  
Michael D. Roy

American Psychiatric Association  
Division of Continuing Medical Education

DIRECTOR OF CME  
Kathleen Debenham

ASSOCIATE DIRECTOR, FOCUS  
Kristen Moeller

Neither the American Psychiatric Association nor American Psychiatric Publishing, Inc., holds itself responsible for statements made in its publications by contributors. Unless so stated, material in FOCUS does not reflect the endorsement, official attitude, or position of the American Psychiatric Association, American Psychiatric Publishing, Inc., or the Journal's Editorial Board.

Authorization to photocopy items for internal or personal use, or the internal or personal use of specific clients, is granted for libraries and other users registered with the Copyright Clearance Center (CCC) Transactional Reporting Service, provided that the base fee of \$15.00 per copy is paid directly to CCC, 222 Rosewood Drive, Danvers, MA 01923; (978) 750-8400 (tel), (978) 646-8600 (fax), www.copyright.com (Web site). 0002-953X/03/\$15.00.

This consent does not extend to other kinds of copying, such as copying for general distribution, for advertising or promotional purposes, for creating new collective works, or for resale. Permission need not be obtained for photocopying isolated articles for nonprofit classroom or library reserve use; all fees associated with such permission are waived.

## Mission Statement *Lifelong Learning in Psychiatry*

An evolving series of educational initiatives developed by the American Psychiatric Association to meet the changing needs of psychiatrists for the 21st century.

### *FOCUS*

The APA continuing education journal is designed for practicing psychiatrists to keep abreast of significant advances in the field, while developing self-directed lifelong learning skills. The goal of *FOCUS* is the lively interactive dissemination of up-to-date information for practicing psychiatrists, facilitating lifelong study skills and critical self-assessment in order to improve patient care.

**The American Board of Psychiatry and Neurology** has reviewed *FOCUS: The Journal of Lifelong Learning in Psychiatry* and the *FOCUS Self-Assessment Examination* and has approved this program as part of a comprehensive lifelong learning and self-assessment program, which is mandated by the American Board of Medical Specialties as a necessary component of maintenance of certification.

#### **Royal College of Physicians and Surgeons of Canada**

The Focus Self Assessment program is accredited for up to 20 hours of continuing professional development per year under Section 3 of the Maintenance of Certification program of the Royal College of Physicians and Surgeons of Canada.

---

## AMERICAN PSYCHIATRIC PUBLISHING, INC. BOARD OF DIRECTORS 2006–2007

### *President and Chair*

Alan F. Schatzberg, M.D.

### *Secretary*

Katharine Phillips, M.D.

### *Treasurer*

Joan A. Lang, M.D.

Dwight L. Evans, M.D.

John M. Oldham, M.D.

Laura Weiss Roberts, M.D.

Pedro Ruiz, M.D.

Donna E. Stewart, M.D., F.R.C.P.(C.)

### EX-OFFICIO MEMBERS

#### *APA President*

Carolyn B. Robinowitz, M.D.

#### *APA President-Elect*

Nada L. Stotland, M.D., M.P.H.

#### *APA Secretary-Treasurer*

Donna M. Norris, M.D.

#### *APA Medical Director*

James Scully, M.D.

#### *Editor-in-Chief, Psychiatric Services*

Howard H. Goldman, M.D., Ph.D.

#### *Editor-in-Chief, Books*

Robert E. Hales, M.D., M.B.A.

#### *Chief Executive Officer*

Ronald E. McMillen
